# Supplementary material for: Retrospective analysis of somatic mutations and clonal hematopoiesis in astronauts
Source: PubMed Central journal article supplement (PMC9385668; doi:10.1038/s42003-022-03777-z), 2022-08-17
Supplement: 42003_2022_3777_MOESM1_ESM.pdf [file 42003_2022_3777_MOESM1_ESM.pdf]

**Supplementary Table 1.** Gene list in VariantPlex Core Myeloid Panel

|         |        |       |       |      |        |       |       |
|---------|--------|-------|-------|------|--------|-------|-------|
| ABL1    | CALR   | ETNK1 | GATA1 | KIIT | PHF6   | SRSF2 | WT1   |
| ANKRD26 | CBL    | ETV6  | GATA2 | KRAS | PTPN11 | STAG2 | ZRSR2 |
| ASXL1   | CEBPA  | EZH2  | IDH1  | MPL  | RUNX1  | TET2  |       |
| BCOR    | CSF3R  | FLT3  | IDH2  | NPM1 | SETBP1 | TP53  |       |
| BRAF    | DNMT3A | DDX41 | JAK2  | NRAS | SF3B1  | U2AF1 |       |
