# Supplementary material for: Retrospective analysis of somatic mutations and clonal hematopoiesis in astronauts
Source: PubMed Central journal article supplement (PMC9385668; doi:10.1038/s42003-022-03777-z), 2022-08-17
Supplement: 42003_2022_3777_MOESM2_ESM.pdf [file 42003_2022_3777_MOESM2_ESM.pdf]

## Description of Additional Supplementary Files

**File name:** Supplementary Data 1

**Description:** Source data of somatic variants detected and used for graphs in the manuscript

**File name:** Supplementary Data 2

**Description:** Statistical evaluation for sequencing data from each sample
